# Supplementary material
Source: MDPI journal article supplement (https://www.mdpi.com/2571-8789/2/2/36)
Supplement: s1 [file s1]

# Variation in the Molecular Structure and Radiocarbon Abundance of Mineral-Associated Organic Matter across a Lithosequence of Forest Soils

Katherine Heckman <sup>1,\*</sup>, Heather Throckmorton <sup>2</sup>, William R. Horwath <sup>2</sup>,  
Christopher W. Swanston <sup>1</sup> and Craig Rasmussen <sup>3</sup>

**Table S1.** Full regression models. HF = heavy fraction.

|                                                                                                                                                                                                                                                  |
|--------------------------------------------------------------------------------------------------------------------------------------------------------------------------------------------------------------------------------------------------|
| $\text{HF \%N} = -0.000767 + 0.0582872(\text{HF \%C}) + 0.0018483(\text{HF } \delta^{15}\text{N}) + 0.0196685(\text{Fe}_{\text{PY}})$ $\text{HF \%C}, p < 0.0001; \text{HF } \delta^{15}\text{N}, p = 0.0053; \text{Fe}_{\text{PY}}, p = 0.0175$ |
| $\text{HF \%N} = 0.0383344 + 1.1654402(\text{Biomass N mg g}^{-1})$ $\text{Biomass N}, p = 0.0028$                                                                                                                                               |
| $\text{HF \%C} = 1.2578155 - 0.235704(\log(\text{depth})) + 0.117679(\text{Al}_{\text{PY}})$ $\log(\text{depth}), p < 0.0001; \text{Al}_{\text{PY}}, p = 0.0116$                                                                                 |
| $\text{HF } \Delta^{14}\text{C} = 1.1349763 - 1.002719(\text{depth}) - 0.004121(\text{Fe}_{\text{D}})$ $\text{Depth}, p < 0.0001; \text{Fe}_{\text{D}} = 0.0036$                                                                                 |
| $\text{HF } \Delta^{14}\text{C} = 1.1200545 - 0.002031(\text{depth}) - 0.002987(\text{SSA})$ $\text{Depth}, p = 0.0012; \text{surface area} = 0.0001$                                                                                            |

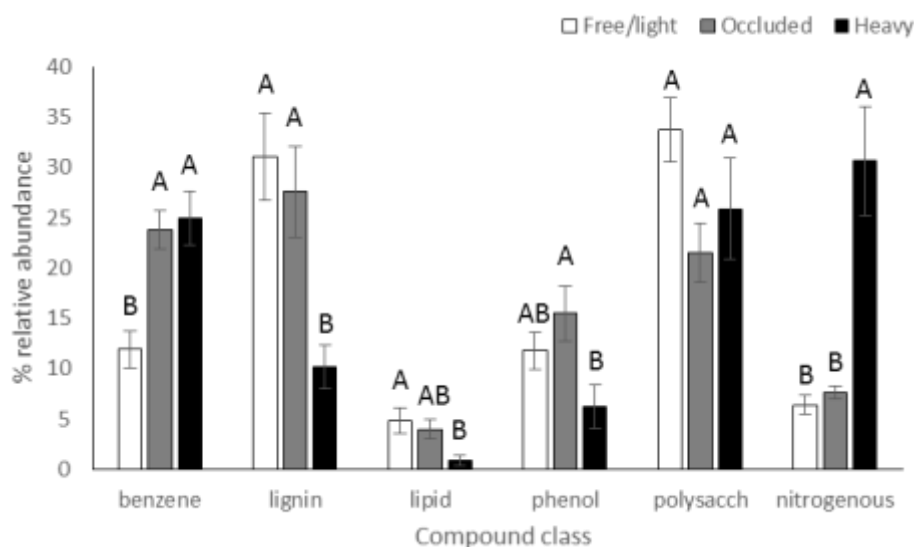

**Figure S1.** Pyrolysis GC/MS compound class abundance: Relative compound class abundance averaged across density fractions and sites ( $n = 8$ ), as determined by pyrolysis GC/MS analysis. Letters indicate significant differences as determined by Tukey HSD,  $\alpha < 0.05$ .
